# Supplementary material
Source: publisher site journal article supplement (https://www.dovepress.com/article/181012)
Supplement: Supplementary file 1 [file get_supplementary_file.php]

Supplementary Table 1 Mean differences on the Børge Priens Prøve among individuals attending the draft board examination, deliveries with induced and non-induced onset of labor 1995-2015, stratified for maternal parity, n=359,277

|                                                                                                                                                                                                                                                                                           | Full cohort                              |                           |                           |
|-------------------------------------------------------------------------------------------------------------------------------------------------------------------------------------------------------------------------------------------------------------------------------------------|------------------------------------------|---------------------------|---------------------------|
|                                                                                                                                                                                                                                                                                           | N <sub>total</sub> /N <sub>exposed</sub> | Unadjusted                | Adjusted*                 |
|                                                                                                                                                                                                                                                                                           |                                          | Mean difference (95 % CI) | Mean difference (95 % CI) |
| Maternal labor augmentation <sup>a</sup>                                                                                                                                                                                                                                                  | 359,277 / 81,890                         | 0.11 (0.04, 0.18)         | -0.17 (-0.24, -0.11)      |
| Maternal parity                                                                                                                                                                                                                                                                           |                                          |                           |                           |
| 0                                                                                                                                                                                                                                                                                         | 166,330 / 53,531                         | -0.05 (-0.15, 0.04)       | -0.11 (-0.21, -0.03)      |
| 1                                                                                                                                                                                                                                                                                         | 132,300 / 19,279                         | -0.41 (-0.55, -0.28)      | -0.27 (-0.40, -0.14)      |
| 2                                                                                                                                                                                                                                                                                         | 46,137 / 6,783                           | -0.44 (-0.68, -0.19)      | -1.19 (-3.86, 3.48)       |
| 3                                                                                                                                                                                                                                                                                         | 10,918 / 1,719                           | -0.98 (-1.50, -0.47)      | -0.80 (-1.29, -0.32)      |
| 4+                                                                                                                                                                                                                                                                                        | 3,592/ 778                               | -1.10 (-1.92, -0.28)      | -1.26 (-2.05, -0.48)      |
| Abbreviations: CI= confidence interval.                                                                                                                                                                                                                                                   |                                          |                           |                           |
| <sup>a</sup> Individuals not exposed to maternal labor augmentation were reference                                                                                                                                                                                                        |                                          |                           |                           |
| * adjusted for birth year (ref=1980), maternal age in years (ref= 25-29), maternal education (ref=low level), maternal parity (ref=nulliparous), gestational age in weeks (ref=37-41), labor induction (ref=no) intrauterine growth (ref= appropriate for gestational age), sex (ref=men) |                                          |                           |                           |

Supplementary Table 2A Mean differences on the Børge Priens Prøve among individuals attending the draft board examination, 1995- 2015, restricted to a study population born between 1991-1996, stratified for maternal parity, n=134,889

|                                                                                                                                                                                                                                                                                                                                 |                                          | Børge Priens Prøve       |                          |
|---------------------------------------------------------------------------------------------------------------------------------------------------------------------------------------------------------------------------------------------------------------------------------------------------------------------------------|------------------------------------------|--------------------------|--------------------------|
|                                                                                                                                                                                                                                                                                                                                 |                                          | Unadjusted               | Adjusted <sup>a</sup>    |
|                                                                                                                                                                                                                                                                                                                                 | N <sub>total</sub> /N <sub>exposed</sub> | Mean difference (95% CI) | Mean difference (95% CI) |
| Maternal labor augmentation <sup>b</sup>                                                                                                                                                                                                                                                                                        | 134889/32195                             | 0.30 (0.19, 0.41)        | -0.30 (-0.42,- 0.19)     |
| Maternal parity <sup>b</sup>                                                                                                                                                                                                                                                                                                    |                                          |                          |                          |
| 0                                                                                                                                                                                                                                                                                                                               | 60996/21688                              | 0.13 (-0.01, 0.28)       | -0.24 (-0.38, -0.10)     |
| 1                                                                                                                                                                                                                                                                                                                               | 50144/7197                               | -0.38 (-0.61, -0.15)     | -0.38 (-0.60, -0.17)     |
| 2                                                                                                                                                                                                                                                                                                                               | 18002/2403                               | -0.51 (-0.91, -0.10)     | -0.58 (-0.97, -0.20)     |
| 3                                                                                                                                                                                                                                                                                                                               | 4317/623                                 | -0.73 (-1.60, 0.15)      | -0.66 (-1.44, 0.15)      |
| 4+                                                                                                                                                                                                                                                                                                                              | 1430/284                                 | -0.39 (-1.75, 0.97)      | -0.50 (-2.10, 1.10)      |
| Abbreviations: CI= confidence interval.                                                                                                                                                                                                                                                                                         |                                          |                          |                          |
| <sup>a</sup> adjusted for birth year (ref=1991), maternal age in years (ref=25-29), maternal education (ref=low level), maternal parity (ref=nulliparous), gestational age in weeks (ref=39-40), preeclampsia (ref=yes), diabetes mellitus (ref=yes) , intrauterine growth (ref=appropriate for gestational age), sex (ref=men) |                                          |                          |                          |
| <sup>b</sup> individuals not exposed to maternal labor augmentation were reference                                                                                                                                                                                                                                              |                                          |                          |                          |

Supplementary Table 2B Mean differences on the Børge Priens Prøve among individuals attending the draft board examination, 1995- 2015, restricted to a study population born between 1991-1996 where deliveries with planned caesarean section were excluded, stratified for maternal parity, n=127,633

|                                          | Børge Priens Prøve                       |                          |                          |
|------------------------------------------|------------------------------------------|--------------------------|--------------------------|
|                                          |                                          | Unadjusted               | Adjusted <sup>a</sup>    |
|                                          | N <sub>total</sub> /N <sub>exposed</sub> | Mean difference (95% CI) | Mean difference (95% CI) |
| Maternal labor augmentation <sup>b</sup> | 127,633/ 32,175                          | 0.25 (0.14, 0.36)        | - 0.35 (-0.47, -0.24)    |
| Maternal parity <sup>b</sup>             |                                          |                          |                          |
| 0                                        | 58338/ 21,676                            | 0.08 (-0.07, 0.23)       | -0.28 (-0.43, -0.14)     |
| 1                                        | 47,412/ 7,191                            | -0.44 (-0.66, -0.21)     | -0.44 (-0.66, -0.23)     |
| 2                                        | 16,582/ 2,402                            | -0.57 (-0.98, -0.16)     | -0.64 (-1.03, -0.26)     |
| 3                                        | 3,963/ 622                               | -0.75 (-1.63, 0.13)      | -0.61 (-1.41, 0.19)      |
| 4+                                       | 1,338/ 284                               | -0.27 (-1.66, 1.11)      | -0.39 (-2.26, 1.47)      |

Abbreviations: CI= confidence interval.

<sup>a</sup> adjusted for birth year (ref=1991), maternal age in years (ref=25-29), maternal education (ref=low level), maternal parity (ref=nulliparous), gestational age in weeks (ref=39-40), preeclampsia (ref=yes), diabetes mellitus (ref=yes) , intrauterine growth (ref=appropriate for gestational age), sex (ref=men)

<sup>b</sup> individuals not exposed to maternal labor augmentation were reference

Supplementary Table 3 Mean differences on the Børge Priens Prøve among individuals attending the draft board examination, 1995- 2015, restricted to individuals born 1991-1996 with available data on smoking, stratified for maternal parity, n=126,847

|                                                                                                                                                                                                                                                                                                                                                   | Børge Priens Prøve                        |                          |                          |                          |
|---------------------------------------------------------------------------------------------------------------------------------------------------------------------------------------------------------------------------------------------------------------------------------------------------------------------------------------------------|-------------------------------------------|--------------------------|--------------------------|--------------------------|
|                                                                                                                                                                                                                                                                                                                                                   |                                           | Unadjusted               | Adjusted for smoking     | Adjusted <sup>a</sup>    |
|                                                                                                                                                                                                                                                                                                                                                   | N <sub>total</sub> / N <sub>exposed</sub> | Mean difference (95% CI) | Mean difference (95% CI) | Mean difference (95% CI) |
| Maternal labor augmentation <sup>b</sup>                                                                                                                                                                                                                                                                                                          | 126,847/ 30,574                           | 0.31 (0.18, 0.42)        | 0.24 (0.13, 0.36)        | -0.30 (-0.41,- 0.19)     |
| Maternal parity <sup>b</sup>                                                                                                                                                                                                                                                                                                                      |                                           |                          |                          |                          |
| 0                                                                                                                                                                                                                                                                                                                                                 | 57,365/ 20,581                            | 0.15 (0.01, 0.30)        | 0.06 (-0.09, 0.22)       | -0.24 (-0.38, -0.09)     |
| 1                                                                                                                                                                                                                                                                                                                                                 | 47,153/6,852                              | -0.37 (-0.59, -0.16)     | -0.38 (-0.62, -0.15)     | -0.36 (-0.58, -0.14)     |
| 2                                                                                                                                                                                                                                                                                                                                                 | 16,928/ 2,275                             | -0.55 (-0.93, -0.17)     | -0.47 (-0.88,-0.05)      | -0.59 (-0.99, -0.20)     |
| 3                                                                                                                                                                                                                                                                                                                                                 | 4,051/ 592                                | -0.69 (-1.48, 0.11)      | -0.67 (-1.56, 0.21)      | -0.63 (-1.45, 0.19)      |
| 4+                                                                                                                                                                                                                                                                                                                                                | 1,350/ 274                                | -0.61 (-1.85, 0.63)      | - 0.56 (-1.95, 0.84)     | -0.84 (-2.78, 1.10)      |
| Abbreviations: CI= confidence interval.                                                                                                                                                                                                                                                                                                           |                                           |                          |                          |                          |
| <sup>a</sup> adjusted for birth year (ref=1991), maternal age in years (ref=25-29), maternal education (ref=low level), maternal parity (ref=nulliparous), gestational age in weeks (ref=39-40), preeclampsia (ref=yes), diabetes mellitus (ref=yes), intrauterine growth (ref=appropriate for gestational age), sex (ref=men), smoking (ref=yes) |                                           |                          |                          |                          |
| <sup>b</sup> individuals not exposed to maternal labor augmentation were reference                                                                                                                                                                                                                                                                |                                           |                          |                          |                          |

Supplementary Table 4 Mean differences on the Børge Priens Prøve among individuals attending the draft board examination, 1995- 2015, restricted to individuals with available data on BMI, stratified for maternal parity, n=237,313

|                                                                                                                                                                                                                                                                                                                                                                    | Børge Priens Prøve                       |                          |                          |                          |
|--------------------------------------------------------------------------------------------------------------------------------------------------------------------------------------------------------------------------------------------------------------------------------------------------------------------------------------------------------------------|------------------------------------------|--------------------------|--------------------------|--------------------------|
|                                                                                                                                                                                                                                                                                                                                                                    |                                          | Unadjusted               | Adjusted for BMI         | Adjusted <sup>a</sup>    |
|                                                                                                                                                                                                                                                                                                                                                                    | N <sub>total</sub> /N <sub>exposed</sub> | Mean difference (95% CI) | Mean difference (95% CI) | Mean difference (95% CI) |
| Maternal labor augmentation <sup>b</sup>                                                                                                                                                                                                                                                                                                                           | 237,313/ 55,223                          | 0.36 (0.27, 0.45)        | 0.39 (0.30, 0.48)        | -0.22 (-0.30, -0.13)     |
| Maternal parity <sup>b</sup>                                                                                                                                                                                                                                                                                                                                       |                                          |                          |                          |                          |
| 0                                                                                                                                                                                                                                                                                                                                                                  | 109,238/ 37,099                          | 0.20 (0.09, 0.32)        | 0.23 (0.11, 0.34)        | -0.16 (-0.27, -0.05)     |
| 1                                                                                                                                                                                                                                                                                                                                                                  | 87,529/ 12,385                           | -0.21 (-0.39, -0.04)     | -0.16 (-0.33, 0.02)      | -0.21 (-0.38, -0.05)     |
| 2                                                                                                                                                                                                                                                                                                                                                                  | 30,792/ 4,159                            | -0.46 (-0.77, -0.15)     | -0.40 (-0.71, -0.09)     | -0.48 (-0.78, -0.18)     |
| 3                                                                                                                                                                                                                                                                                                                                                                  | 7,338/ 1,072                             | -0.92 (-1.60, -0.25)     | -0.85 (-1.52, -0.17)     | -0.88 (-1.51, -0.25)     |
| 4+                                                                                                                                                                                                                                                                                                                                                                 | 2,416/ 508                               | -1.07 (-2.13, -0.02)     | -0.95 (-2.00, 0.10)      | -1.21 (-2.26, -0.16)     |
| Abbreviations: CI= confidence interval                                                                                                                                                                                                                                                                                                                             |                                          |                          |                          |                          |
| <sup>a</sup> adjusted for birth year (ref=1980), maternal age in years (ref=25-29), maternal education (ref=low level), maternal parity (ref=nulliparous), gestational age in weeks (ref=39-40), preeclampsia (ref=yes), diabetes mellitus (ref=yes), intrauterine growth (ref=appropriate for gestational age), sex (ref=men) and individuals BMI (ref=18.5-24.9) |                                          |                          |                          |                          |
| <sup>b</sup> individuals not exposed to maternal labor augmentation were reference                                                                                                                                                                                                                                                                                 |                                          |                          |                          |                          |
