# Supplementary material
Source: publisher site journal article supplement (https://www.dovepress.com/article/181012)
Supplement: Supplementary file 2 [file get_supplementary_file.php]

Supplementary Table 5 Mean differences on the Børge Priens Prøve among women attending the draft board examination, 1995- 2015, stratified for maternal parity, n=11,967

|                                                                                                                                                                                                                                                                                                        |                                          | Børge Priens Prøve       |                          |
|--------------------------------------------------------------------------------------------------------------------------------------------------------------------------------------------------------------------------------------------------------------------------------------------------------|------------------------------------------|--------------------------|--------------------------|
|                                                                                                                                                                                                                                                                                                        |                                          | Unadjusted               | Adjusted <sup>a</sup>    |
|                                                                                                                                                                                                                                                                                                        | N <sub>total</sub> /N <sub>exposed</sub> | Mean difference (95% CI) | Mean difference (95% CI) |
| Maternal labor augmentation <sup>b</sup>                                                                                                                                                                                                                                                               | 11090/2238                               | 0.12 (-0.26, 0.50)       | 0.06 (-0.29, 0.43)       |
| Maternal parity <sup>b</sup>                                                                                                                                                                                                                                                                           |                                          |                          |                          |
| 0                                                                                                                                                                                                                                                                                                      | 4857/1476                                | -0.05 (-0.53, 0.47)      | -0.33 (-0.81, 0.16)      |
| 1                                                                                                                                                                                                                                                                                                      | 4335/500                                 | -0.36 (-1.10, 0.39)      | -0.41 (-1.14, 0.32)      |
| 2                                                                                                                                                                                                                                                                                                      | 1456/183                                 | 0.02 (-1.21, 1.25)       | -0.19 (-1.34, 0.96)      |
| 3                                                                                                                                                                                                                                                                                                      | 352/59                                   | -0.75 (-2.99, 1.48)      | -0.43 (-2.58, 1.71)      |
| 4+                                                                                                                                                                                                                                                                                                     | 90/20                                    | -1.04 (-5.66, 3.58)      | NA                       |
| Abbreviations: CI= confidence interval.                                                                                                                                                                                                                                                                |                                          |                          |                          |
| <sup>a</sup> adjusted for birth year (ref=1980), maternal age in years (ref=25-29), maternal education (ref=low level), maternal parity (ref=nulliparous), gestational age in weeks (ref=39-40), preeclampsia (ref=yes), diabetes (ref=yes), intrauterine growth (ref=appropriate for gestational age) |                                          |                          |                          |
| <sup>b</sup> individuals not exposed to maternal labor augmentation were reference                                                                                                                                                                                                                     |                                          |                          |                          |
